# Supplementary material for: SIRPA is a specific cell-surface marker for isolating cardiomyocytes derived from human pluripotent stem cells
Source: Springer Nature journal article supplement (doi:10.1038/nbt.2005), 2011-10-23
Supplement: 41587_2011_BFnbt2005_MOESM17_ESM.pdf [file 41587_2011_BFnbt2005_MOESM17_ESM.pdf]

# Supplementary Figure 1

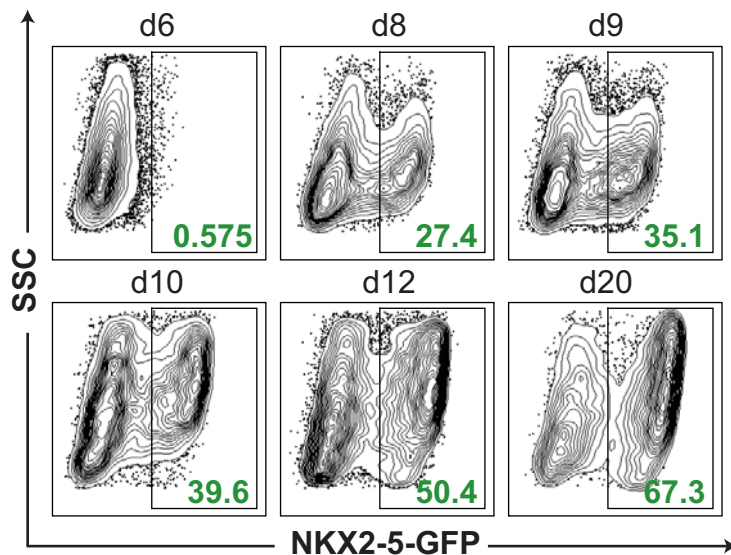

**Supplementary Figure 1** Differentiation kinetics of the NKX2-5-GFP HES3 hESC line (Elliott et al., 2011). Flow cytometric analysis of EBs derived from the NKX2-5-GFP hESC line at various times during differentiation. GFP expression is first detected at day 8 of differentiation and increases over time with maximum expression at day 20.

# Supplementary Figure 2

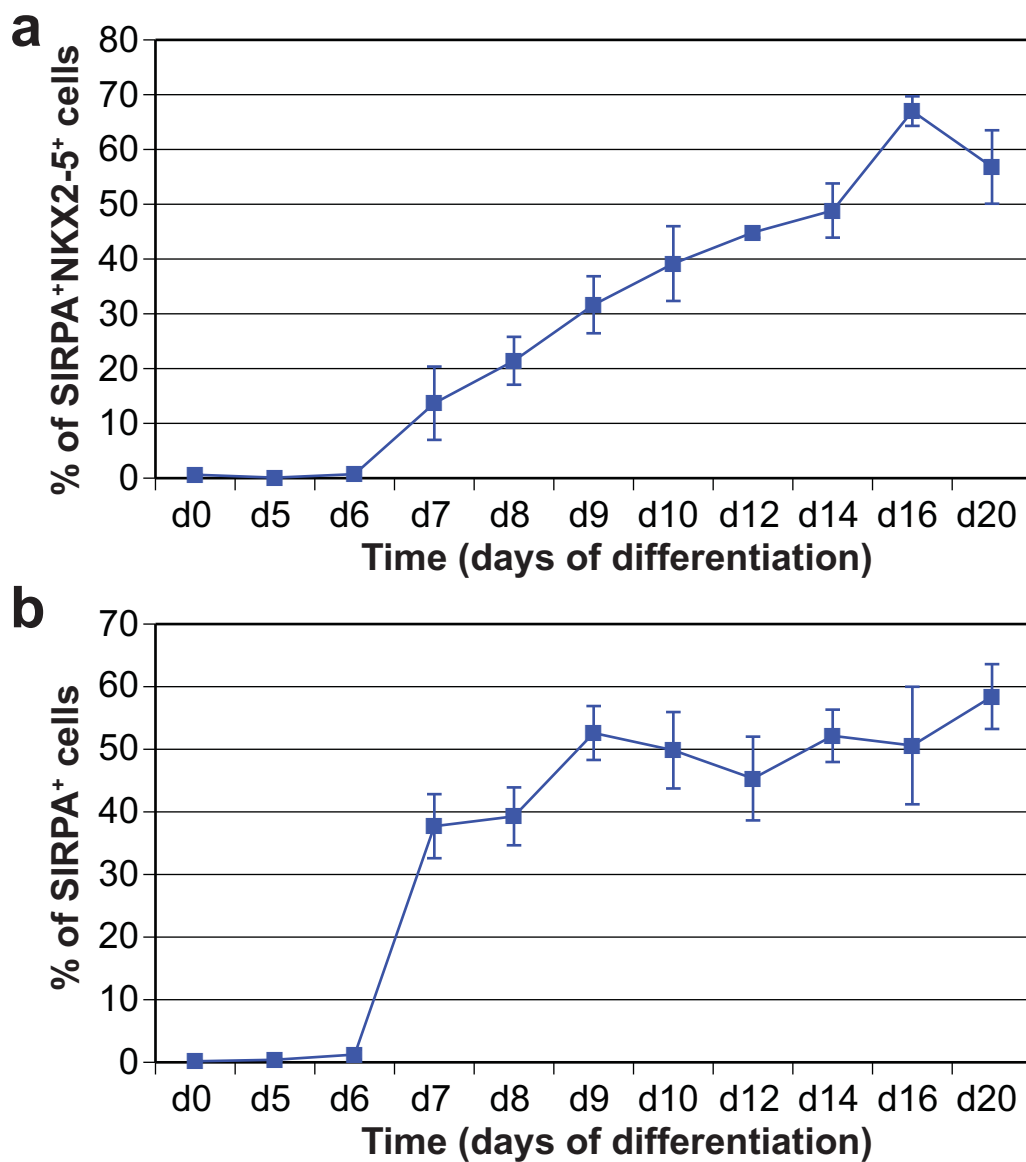

**Supplementary Figure 2** SIRPA expression kinetics of the NKX2-5-GFP HES3 and the HES2 hESC lines. **(a)** Quantification of SIRPA<sup>+</sup>/NKX2-5-GFP<sup>+</sup> cells by flow cytometric analysis. EBs derived from the NKX2-5-GFP hESC line were analyzed for SIRPA expression at various times during differentiation. Bars represent standard error of the mean, n=5. **(b)** Analysis and quantification of SIRPA<sup>+</sup> cells by flow cytometric analysis. EBs derived from the HES2 hESC line were analyzed at various times during differentiation. Bars represent standard error of the mean, n=8. d0=undifferentiated ES cells, d5-d20=differentiated EBs at day5-day20.

# Supplementary Figure 3

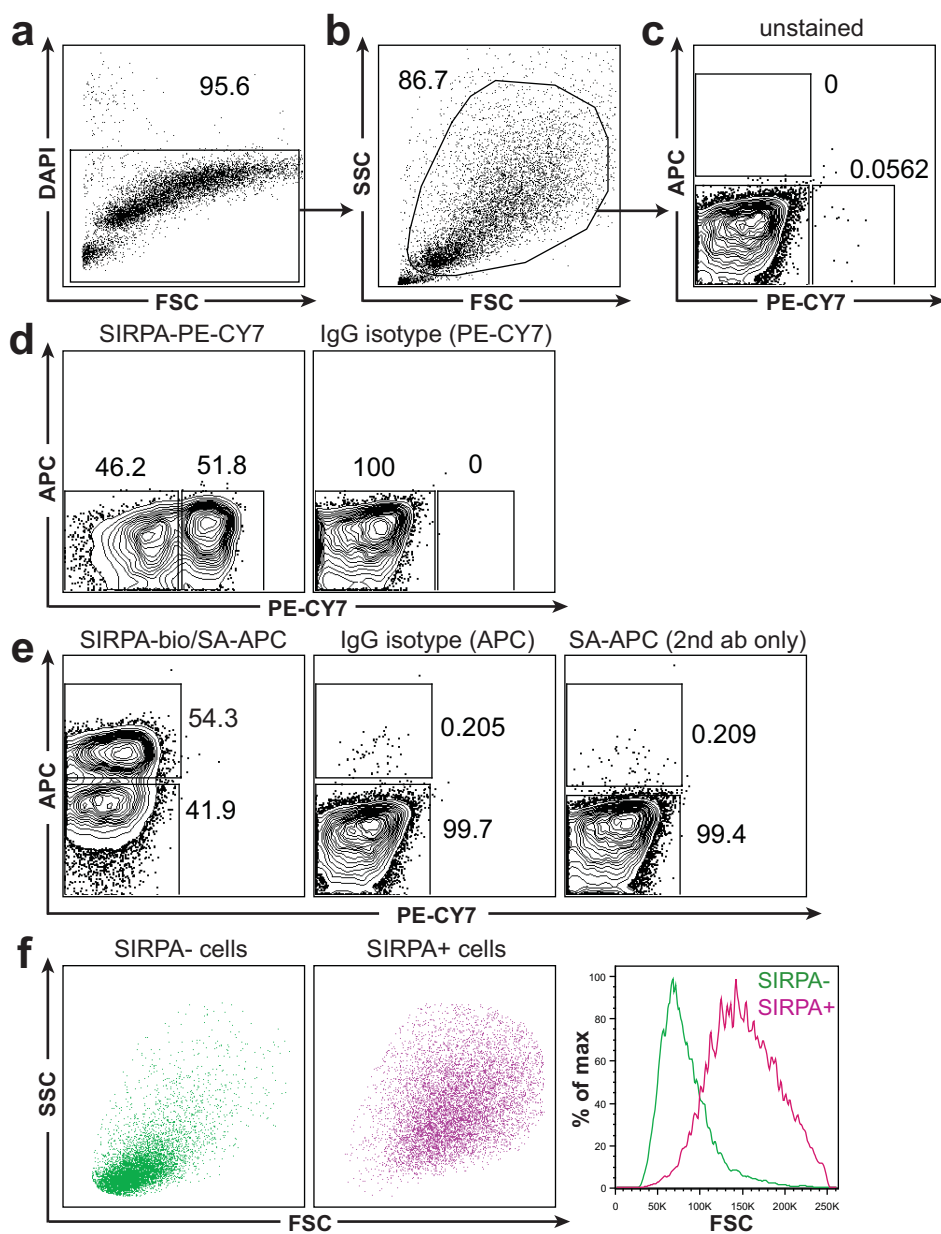

**Supplementary Figure 3** Flow cytometry analysis strategy and staining controls. **(a)** Flow cytometric analysis of day 20 EB-derived cells (HES2). All cells were stained with the viability dye DAPI and only DAPI-negative cells (=viable cells) were analyzed for each experiment. **(b)** Viable single cells were further defined by FSC/SSC (cell size and granularity) to exclude debris and doublets or cell clumps. **(c)** Unstained control of EB-derived cells at day 20 of differentiation. **(d)** Flow cytometric analysis of day 20 EB-derived cells with the SIRPA-PE-Cy7 antibody and the corresponding IgG control. **(e)** Flow cytometric analysis of day 20 EB-derived cells with the SIRPA-biotin/Streptavidin-APC (SIRPA-bio/SA-APC) antibody combination, the corresponding IgG control and secondary antibody only staining. **(f)** Comparison of cell size between SIRPA- and SIRPA+ cell populations (from (e)) by FSC.

# Supplementary Figure 4

**a**

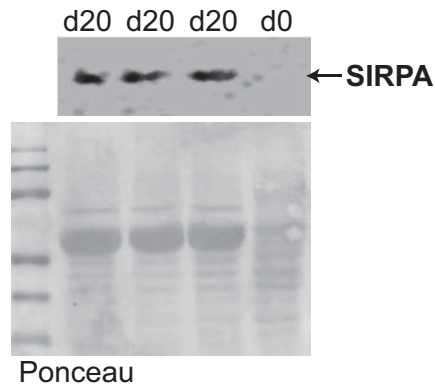

**b**

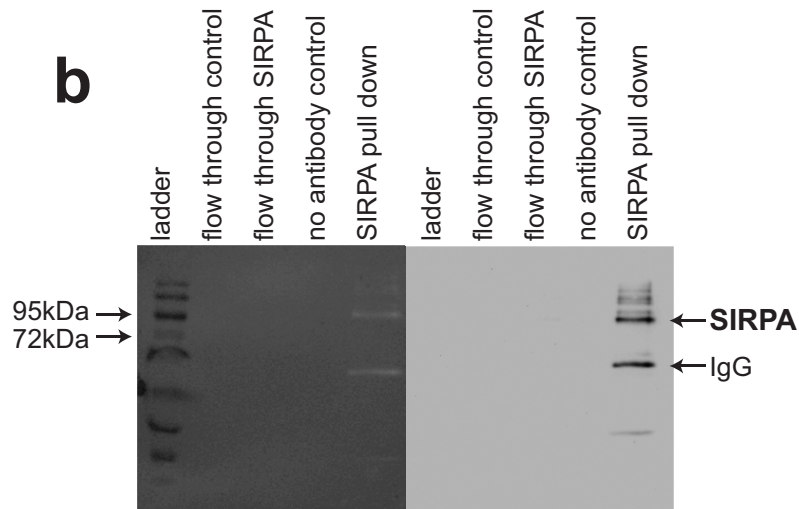

**Supplementary Figure 4** Western Blot analysis and immunoprecipitation to confirm the specificity of the anti-SIRPA antibody. **(a)** Western Blot analysis of 3 samples from day 20 (d20) differentiation cultures compared to undifferentiated ES cells (d0). The anti-SIRPA SE5A5 antibody was used and Ponceau staining is shown for a loading control. **(b)** Co-immunoprecipitation with the anti-SIRPA SE5A5a antibody with controls. SIRPA runs at the predicted size, as previously described and analyzed in Timms et al., 1999.

# Supplementary Figure 5

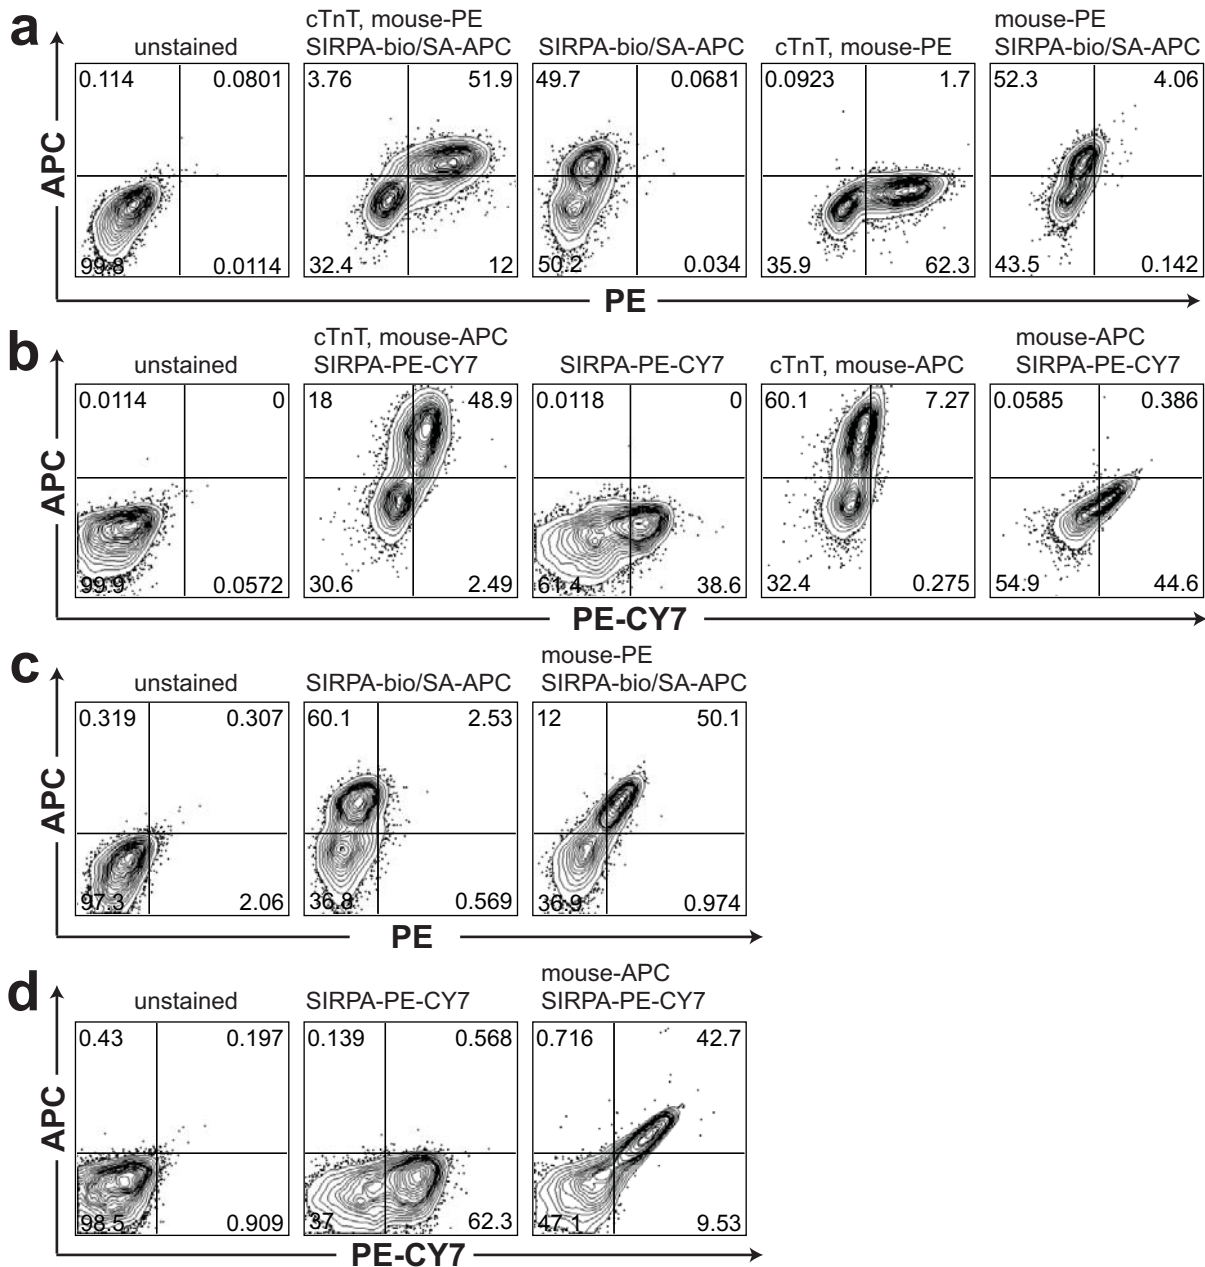

**Supplementary Figure 5** Co-expression of SIRPA and cTnT by flow cytometry. **(a)** Cells from day 20 HES2-derived EBs were stained for SIRPA first, then fixed (4%PFA, 20min), followed by intracellular staining for cTnT. Since both primary antibodies have been raised in mouse, appropriate controls are shown as well. Cells were stained for anti-SIRPA-biotin/Streptavidin-APC (SIRPA single stain), anti-SIRPA-biotin/Streptavidin-APC and anti-mouse-PE (control to demonstrate that the secondary antibody for cTnT does not recognize SIRPA after fixation), anti-SIRPA-biotin/Streptavidin-APC and anti-cTnT and anti-mouse-PE (SIRPA and cTnT co-staining). **(b)** Same as in (a), but with a different antibody combination. **(c)** Live stain of day20 HES2-derived cells for SIRPA. Co-staining for SIRPA (PE-CY7) and a secondary mouse antibody (APC) demonstrates that, without fixation, mouse secondary antibodies do bind to SIRPA as expected. **(d)** same as in (c) with different antibody combination.

# Supplementary Figure 6

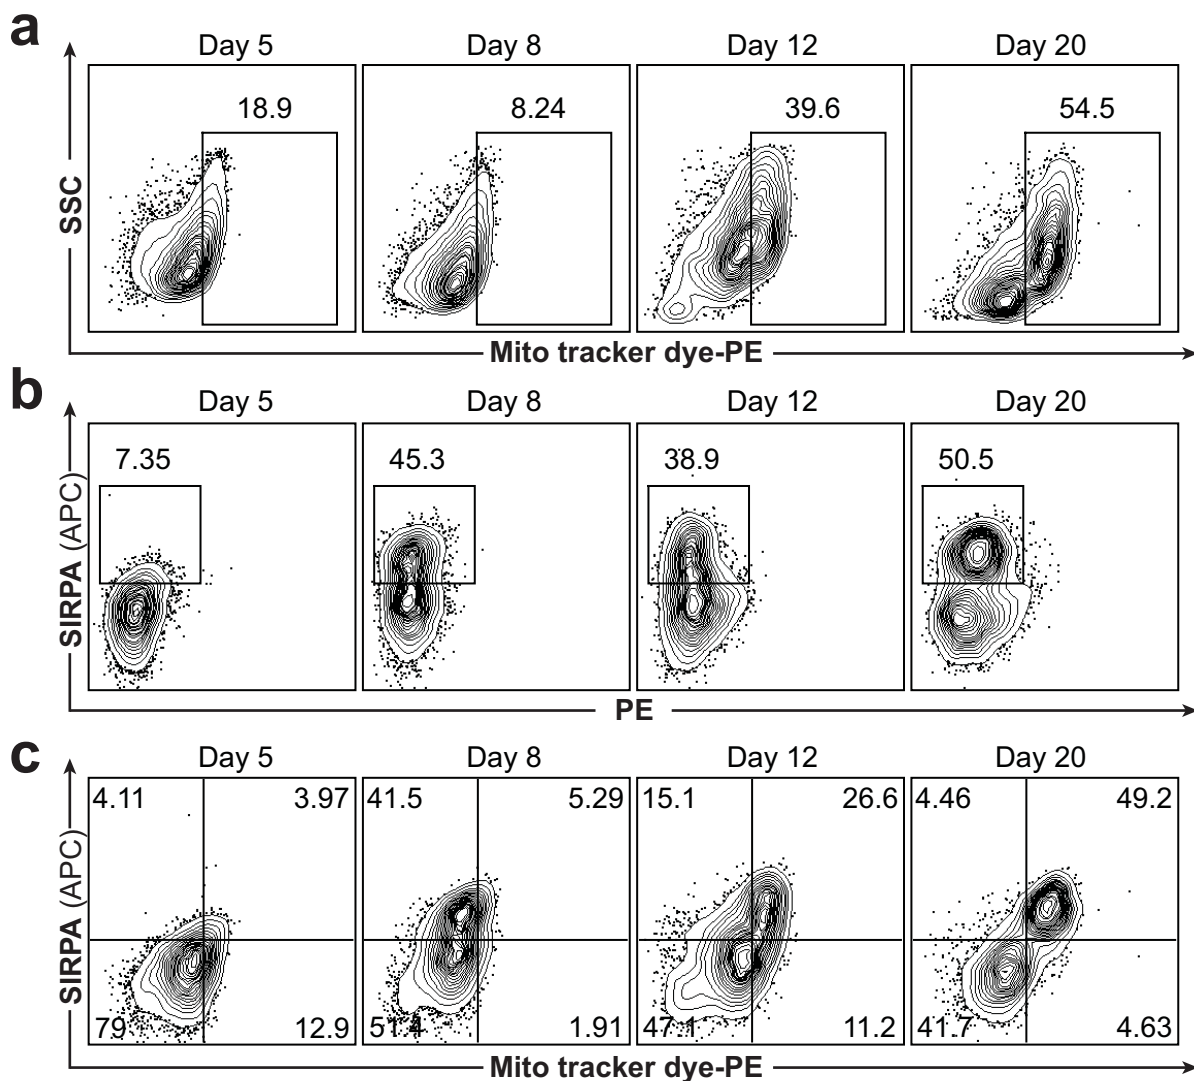

**Supplementary Figure 6** Comparison of anti-SIRPA antibody staining with mito tracker dye retention labelling. **(a)** Flow cytometric analysis of mito tracker dye labelling at day 5, 8, 12 and 20 of differentiation from HES2 hESCs. **(b)** Flow cytometric analysis of anti-SIRPA at day 5, 8, 12 and 20 of differentiation from HES2 hESCs. **(c)** Co-staining of anti-SIRPA and mito tracker dye labelling followed by flow cytometric analysis at day 5, 8, 12 and 20 of differentiation from HES2 hESCs.

# Supplementary Figure 7

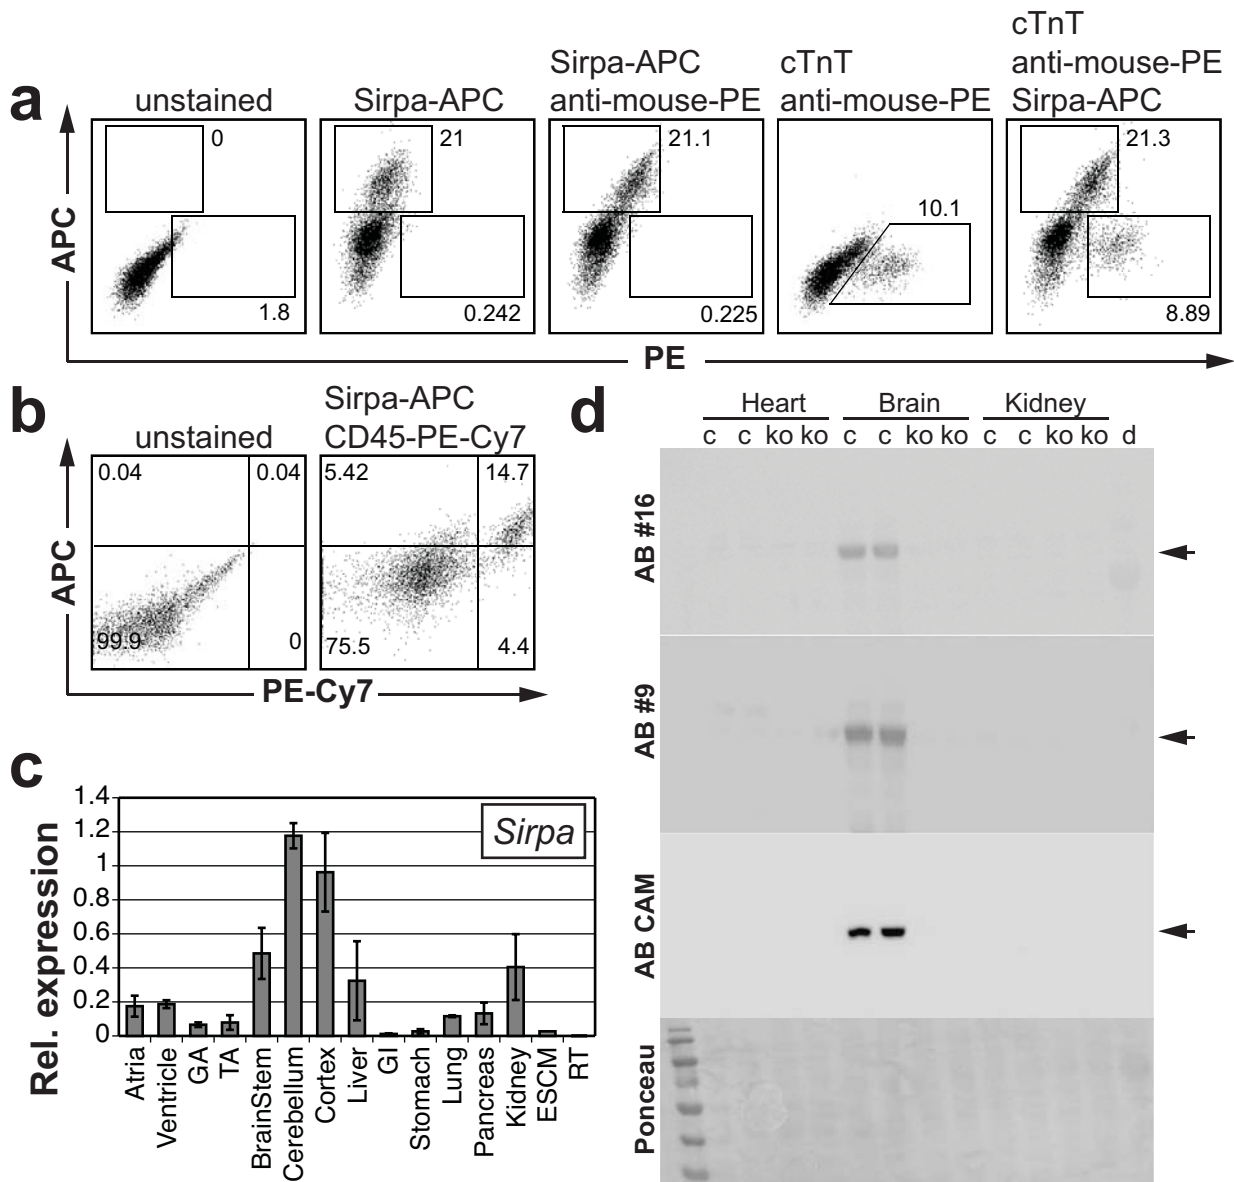

**Supplementary Figure 7** Analysis of *Sirpa* expression in mouse embryonic stem cell-derived cardiomyocytes and adult mouse tissue samples. **(a)** Flow cytometric analysis of mESC-derived cardiac EB cultures. Cells were stained with Sirpa-APC, fixed with 4%PFA and stained with cTnT/anti-mouse-PE. Sirpa-expressing cells did not co-stain with cTnT-expressing cells, suggesting that cardiomyocytes derived from mES cells do not express Sirpa. **(b)** Flow cytometric analysis of mESC-derived cardiac EB cultures. Sirpa-positive cells co-stain with CD45-PE-Cy7, suggesting that the Sirpa-positive cells present in these cultures represent hematopoietic cells, which have previously been described to express Sirpa (Seiffert et al., 1999). **(c)** RT-qPCR analysis of *Sirpa* in adult mouse tissue samples. TA, tibialis anterior muscle; GA, gastrocnemius muscle; GI, gastrointestinal tract; RT, reverse transcriptase control; ESCM, mouse embryonic stem cell derived cardiomyocytes from day7 old cultures (Kattman et al., 2011). Mouse brain tissue was used as positive control. Bars represent standard error of the mean, n=4. **(d)** Western blot analysis of adult heart, brain and kidney tissue from control (c) and Sirpa-deficient mice (ko)(Timms et al., 1999) and mouse ESC-derived cardiomyocytes (d). Sirpa expression was solely detected in the brain tissue of control mice, but not in any of the Sirpa-deficient samples or in the control heart, kidney or mESC-derived samples. Antibodies #16 and #9 (specific for cytoplasmic domain, common to all Sirpa isoforms, AB#16, AB#9) were used as described in Timms et al., 1999. ABCAM: anti-Sirpa antibody



# Supplementary Figure 8

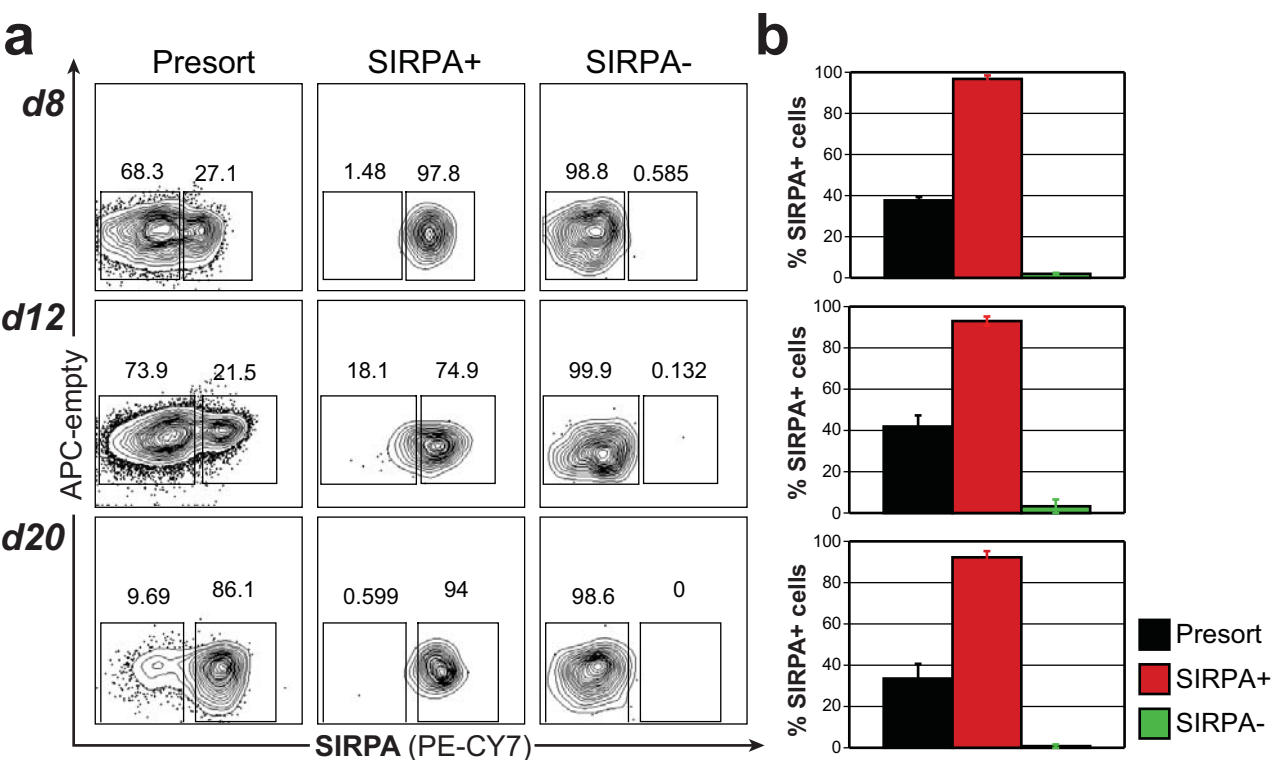

**Supplementary Figure 8** Analysis of purity of SIRPA- and SIRPA+ fractions following FACS. **(a)** Flow cytometric analysis of presort, SIRPA- and SIRPA+ fraction for SIRPA following cell sorting. **(b)** quantification of SIRPA+ cells in presort, SIRPA- and SIRPA+ fraction following cell sorting. Bars represent standard error of the mean, n=3.



# Supplementary Figure 9

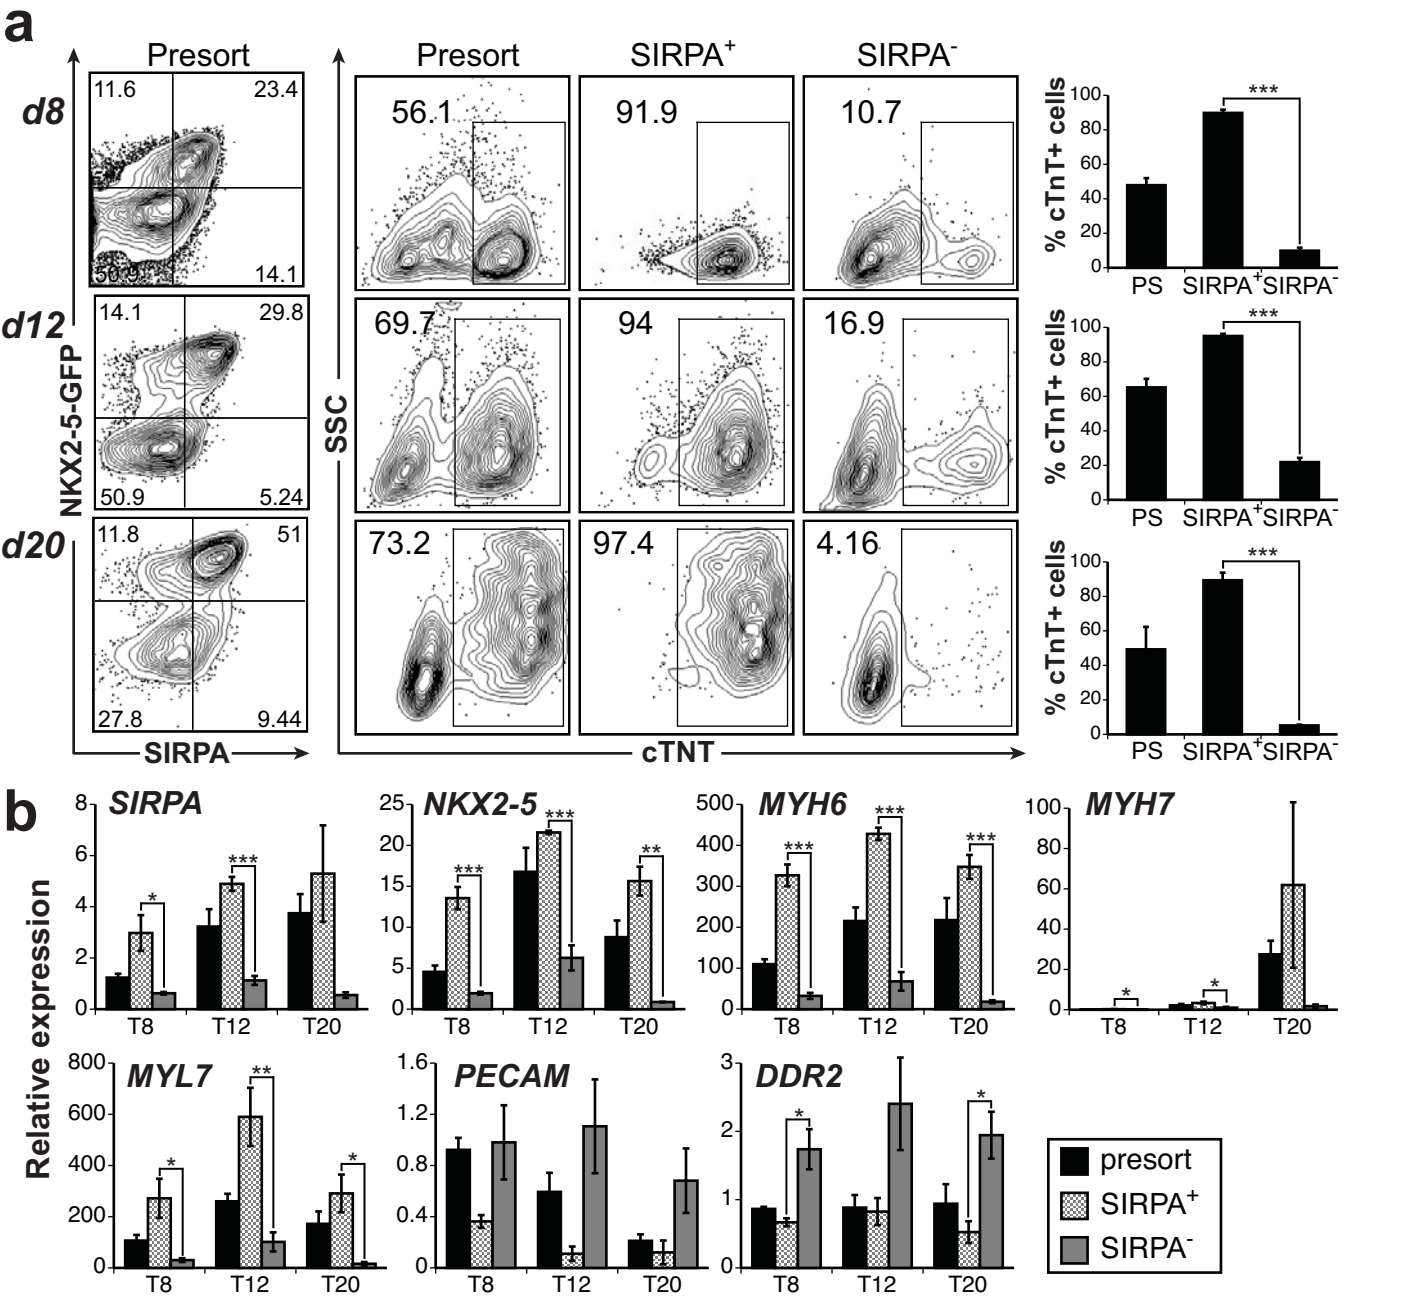

**Supplementary Figure 9** Enrichment of cardiomyocytes from hESC-derived cultures by cell sorting based on SIRPA expression. **(a)** Flow cytometric analysis of SIRPA expression at day (d)8, d12 and d20 of differentiation from NKX2-5-GFP HES3 hESCs. Fluorescent-activated cell sorting (FACS) for SIRPA was performed at d8, d12 and d20 and the presort (PS), SIRPA<sup>+</sup> and SIRPA<sup>-</sup> fractions were analysed for cardiac TroponinT (cTnT) expression by intracellular flow cytometry. The frequency of cTnT<sup>+</sup> cells at d8, d12 and d20 was significantly higher in the SIRPA<sup>+</sup> fraction (day8: 89.8% ± 1.9, day12: 95.0 ± 1.3, day20: 89.4 ± 4.4), compared to SIRPA<sup>-</sup> cells (day8: 9.9 ± 1.7, day12: 21.9 ± 2.5, day20: 5.2 ± 0.5), n=3. **(b)** QPCR analysis of PS, SIRPA<sup>+</sup> and SIRPA<sup>-</sup> cells after cell sorting. Expression of markers specific for the cardiac lineage (*NKX2-5*, *MYH6*, *MYH7* and *MYL7*) was significantly higher in the SIRPA<sup>+</sup> compared to SIRPA<sup>-</sup> fraction at all stages analyzed (d8, d12 and d20). Expression of markers for the non-cardiac lineages (*PECAM* and *DDR2*) segregated to the SIRPA<sup>-</sup> fraction and the PS cells. Bars represent standard error of the mean, n=3.

# Supplementary Figure 10

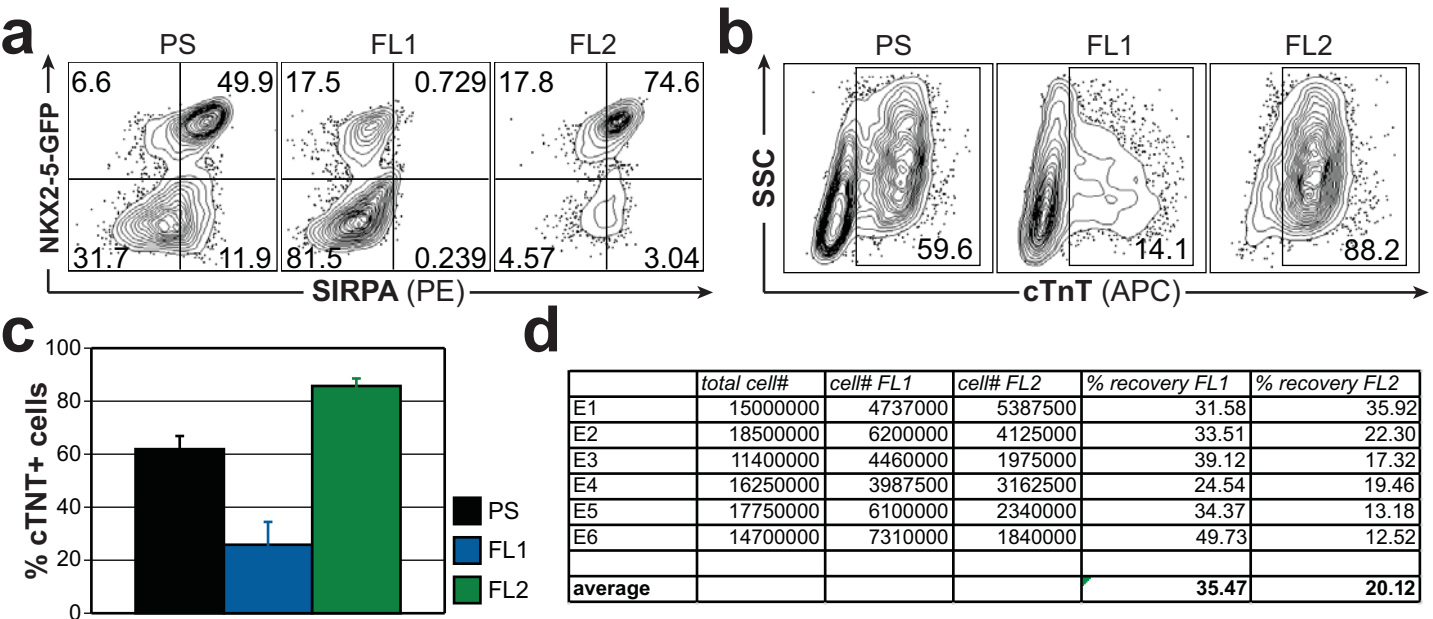

**Supplementary Figure 10** Isolation of SIRPA<sup>+</sup> cardiomyocytes via bead sorting. **(a)** Flow cytometric analysis of SIRPA. NKX2-5GFP-derived EBs were sorted using the Miltenyi magnetic bead sorting system. *In brief:* cells were labelled with SIRPA-PE antibody (20min) and incubated with anti-PE beads (15min, 4C). The labelled cells were passed through a positive selection column (LS columns). Flow through 1 (FL1, SIRPA-depleted fraction) and flow through 2 (FL2, SIRPA-enriched fraction, eluted from the column) were collected and analyzed. PS, FL1 and FL2 fractions after sorting were analyzed for SIRPA expression. **(b)** Intracellular cTnT flow cytometric analysis of PS, FL1 and FL2 fractions. **(c)** Quantification of cTnT-expression of the PS, FL1 and FL2 fractions. **(d)** Quantification of the efficiency of magnetic bead sorting.

# Supplementary Figure 11

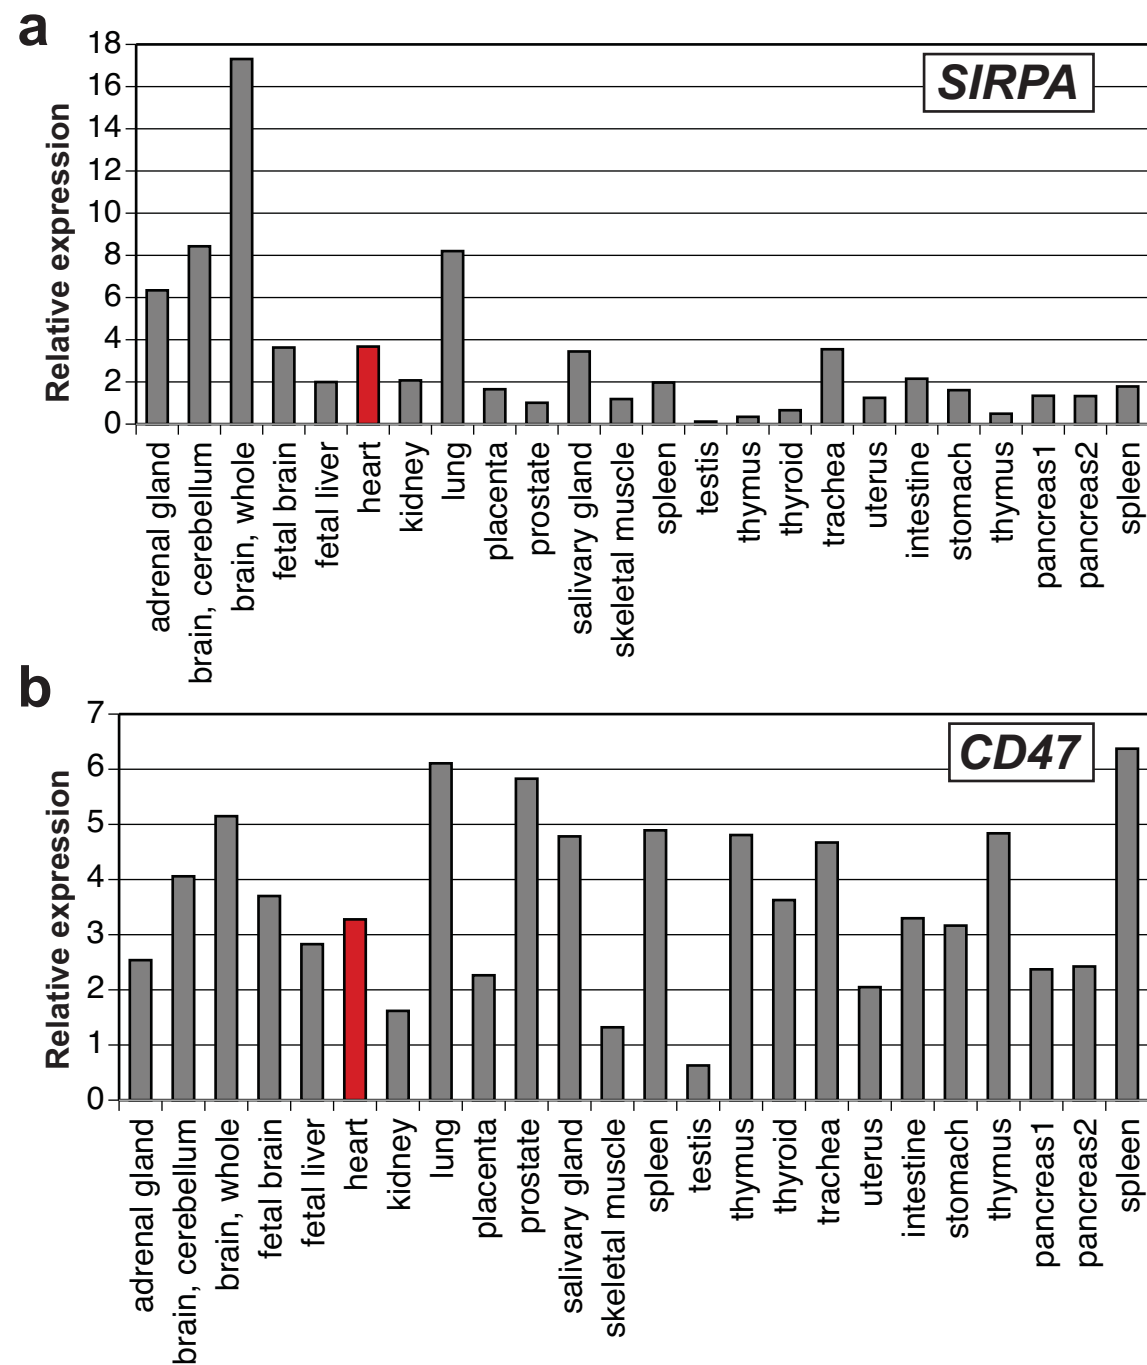

**Supplementary Figure 11** Gene expression analysis of human adult tissue. **(a)** RT-qPCR analysis of SIRPA. **(b)** RT-qPCR analysis of CD47.

# Supplementary Figure 12

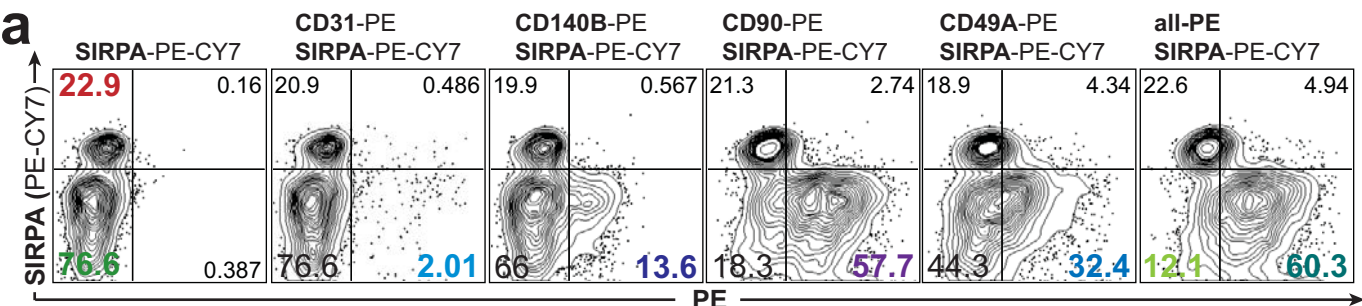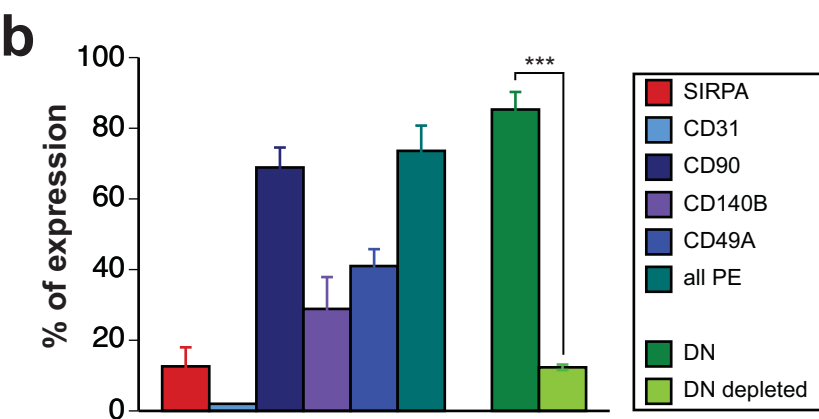

**Supplementary Figure 12** Expression of non-myocyte markers from the iPSC line MSC-iPS1-derived differentiation cultures. **(a)** Flow cytometric analysis of markers specifically expressed on non-myocyte (SIRPA-) cells in day 20 differentiation cultures. **(b)** Quantification of expression of non-myocyte markers by flow cytometry at day 20 of differentiation from MSC-iPS1 iPS cells. *DN*, all SIRPA-negative cells (76.6% in (a), first panel); *DN depleted*, remaining double negative cells after staining with SIRPA and the all-PE lineage cocktail (12.1% in (a), last panel).

# Supplementary Table 1

**a**

|         | Total cell# | SIRPA- cell# | SIRPA- (%) | SIRPA- exp cell# | Eff SIRPA- | Eff SIRPA - (%) |
|---------|-------------|--------------|------------|------------------|------------|-----------------|
| E1      | 5920000     | 844000       | 31.28      | 1851776          | 0.46       | <b>45.58</b>    |
| E2      | 3070000     | 594670       | 32.98      | 1012486          | 0.59       | <b>58.74</b>    |
| E3      | 2200000     | 372940       | 33.57      | 738540           | 0.50       | <b>50.50</b>    |
| E4      | 6980000     | 1380000      | 34.08      | 2378784          | 0.58       | <b>58.01</b>    |
| E5      | 34900000    | 4700000      | 20.42      | 7126580          | 0.66       | <b>65.95</b>    |
| E6      | 14200000    | 2590000      | 50.5       | 7171000          | 0.36       | <b>36.12</b>    |
| E7      | 17100000    | 3650000      | 36.12      | 6176520          | 0.59       | <b>59.09</b>    |
| E8      | 15390000    | 476000       | 5.24       | 806436           | 0.59       | <b>59.03</b>    |
|         |             |              |            |                  |            |                 |
| Average |             |              |            |                  |            | <b>54.13</b>    |

**b**

|         | Total cell# | SIRPA+ cell# | SIRPA+ (%) | SIRPA+ exp cell# | Eff SIRPA+ | Eff SIRPA+ (%) |
|---------|-------------|--------------|------------|------------------|------------|----------------|
| E1      | 5920000     | 419000       | 31.3       | 1852960          | 0.23       | <b>22.61</b>   |
| E2      | 3070000     | 163830       | 10.17      | 312219           | 0.52       | <b>52.47</b>   |
| E3      | 2200000     | 93300        | 8.56       | 188320           | 0.50       | <b>49.54</b>   |
| E4      | 6980000     | 461000       | 30.08      | 2099584          | 0.22       | <b>21.96</b>   |
| E5      | 34900000    | 1640000      | 17.79      | 6208710          | 0.26       | <b>26.41</b>   |
| E6      | 14200000    | 299000       | 10.8       | 1533600          | 0.19       | <b>19.50</b>   |
| E7      | 17100000    | 1930000      | 32.98      | 5639580          | 0.34       | <b>34.22</b>   |
| E8      | 15390000    | 4650000      | 65.15      | 10026585         | 0.46       | <b>46.38</b>   |
| E9      | 14800000    | 3600000      | 55.23      | 8174040          | 0.44       | <b>44.04</b>   |
|         |             |              |            |                  |            |                |
| Average |             |              |            |                  |            | <b>35.24</b>   |

**Supplementary Table 1** Efficiency of fluorescent-activated cell sorting (FACS) with the anti-SIRPA antibody. **(a)** Recovery of SIRPA<sup>-</sup> cells after FACS of EB-derived cells from HES2 at day20 of differentiation, n=8. **(b)** Recovery of SIRPA<sup>+</sup> cells after FACS of EB-derived cells from HES2 at day20 of differentiation, n=9. *Total cell #* = total cells passed through the flow cytometer; *SIRPA<sup>-</sup>(SIRPA<sup>+</sup>)#* = total SIRPA<sup>-</sup>(SIRPA<sup>+</sup>) cells recovered after the sorting procedure; *SIRPA<sup>-</sup>(SIRPA<sup>+</sup>)%* = percentage of SIRPA<sup>-</sup>(SIRPA<sup>+</sup>) cells determined by staining with the SIRPA antibody; *SIRPA<sup>-</sup>(SIRPA<sup>+</sup>) exp cell#* = cell number of SIRPA<sup>-</sup>(SIRPA<sup>+</sup>) cells expected based on staining with the SIRPA antibody and on total cell number sorted; *Eff SIRPA<sup>-</sup>(SIRPA<sup>+</sup>)* = efficiency of SIRPA<sup>-</sup>(SIRPA<sup>+</sup>) cell recovery: SIRPA<sup>-</sup>(SIRPA<sup>+</sup>) cell# / SIRPA<sup>-</sup>(SIRPA<sup>+</sup>) exp cell#; *Eff SIRPA<sup>-</sup>(SIRPA<sup>+</sup>)* = efficiency of SIRPA<sup>-</sup>(SIRPA<sup>+</sup>) cell recovery in percentage.

# Supplementary Table 2

**a**

| total cell# | LIN- cell# | LIN- (%) | LIN- exp cell# | Eff LIN- | Eff LIN- (%) |
|-------------|------------|----------|----------------|----------|--------------|
| 10800000    | 2770000    | 78.65    | 8494200        | 0.32     | <b>32.61</b> |
| 5850000     | 531100     | 21.73    | 1271205        | 0.42     | <b>41.78</b> |
| 14000000    | 1110000    | 18.12    | 2536800        | 0.44     | <b>43.76</b> |
| 26000000    | 2350000    | 26.73    | 6949800        | 0.34     | <b>33.81</b> |
| 15080000    | 3430000    | 51.31    | 7737548        | 0.44     | <b>44.33</b> |
| 10300000    | 3000000    | 47.89    | 4932670        | 0.60     | <b>60.82</b> |
|             |            |          |                |          |              |
| average     |            |          |                |          | <b>42.85</b> |

**b**

| total cell# | LIN+ cell# | LIN+ (%) | LIN+ exp cell# | Eff LIN+ | Eff LIN+ (%) |
|-------------|------------|----------|----------------|----------|--------------|
| 10800000    | 680000     | 10.32    | 1114560        | 0.61     | <b>61.01</b> |
| 5850000     | 157700     | 5.48     | 320580         | 0.49     | <b>49.19</b> |
| 14000000    | 1360000    | 20.42    | 2858800        | 0.48     | <b>47.57</b> |
| 26000000    | 3810000    | 38.55    | 10023000       | 0.38     | <b>38.01</b> |
| 15080000    | 1960000    | 21.37    | 3222596        | 0.61     | <b>60.82</b> |
| 10300000    | 2200000    | 35.9     | 3697700        | 0.59     | <b>59.50</b> |
|             |            |          |                |          |              |
| average     |            |          |                |          | <b>52.68</b> |

**Supplementary Table 2** Efficiency of fluorescent-activated cell sorting (FACS) with the non-myocyte markers CD31, CD90, CD140B and CD49A (LIN). **(a)** Recovery of LIN<sup>-</sup> cells after FACS of EB-derived cells from HES2 at day20 of differentiation, n=6. **(b)** Recovery of LIN<sup>+</sup> cells after FACS of EB-derived cells from HES2 at day20 of differentiation, n=6. *Total cell #* = total cells passed through the flow cytometer; *LIN<sup>-</sup>(LIN<sup>+</sup>)#* = total LIN<sup>-</sup>(LIN<sup>+</sup>) cells recovered after the sorting procedure; *LIN<sup>-</sup>(LIN<sup>+</sup>)%* = percentage of LIN<sup>-</sup>(LIN<sup>+</sup>) cells determined by staining with the LIN antibodies; *LIN<sup>-</sup>(LIN<sup>+</sup>) exp cell#* = cells number of LIN<sup>-</sup>(LIN<sup>+</sup>) cells expected based on staining with the LIN antibodies and on total cell number sorted; *Eff LIN<sup>-</sup>(LIN<sup>+</sup>)* = efficiency of LIN<sup>-</sup>(LIN<sup>+</sup>) cell recovery: *LIN<sup>-</sup>(LIN<sup>+</sup>) cell#* / *LIN<sup>-</sup>(LIN<sup>+</sup>) exp cell#*; *Eff LIN<sup>-</sup>(LIN<sup>+</sup>)* = efficiency of LIN<sup>-</sup>(LIN<sup>+</sup>) cell recovery in percentage.

# Supplementary Table 3

| <b>GENE</b>   | <b>FORWARD 5'-3'</b>       | <b>REVERSE 5'-3'</b>     |
|---------------|----------------------------|--------------------------|
| hTBP          | TGAGTTGCTCATACCGTGCTGCTA   | CCCTCAAACCAACTTGCAACAGC  |
| hBRACHURY (T) | TGTCCCAGGTGGCTTACAGATGAA   | GGTGTGCCAAAGTTGCCAATACAC |
| hMESP1        | AGCCCAAGTGACAAGGGACAAC     | AAGGAACCACTTCGAAGGTGCTGA |
| hISL1         | GAAGGTGGAGCTGCATTGGTTTGA   | TAAACCAGCTACAGGACAGGCCAA |
| hNKX2-5       | TTTGCATTCACTCCTGCGGAGACCTA | ACTCATTGCACGCTGCATAATCGC |
| hMYH6         | TCAGCTGGAGGCCAAAGTAAAGGA   | TTCTTGAGCTCTGAGCACTCGTCT |
| hMYH7         | TCGTGCCTGATGACAAACAGGAGT   | ATACTCGGTCTCGGCAGTGACTTT |
| hMYL2         | TGTCCCTACCTTGCTGTTAGCCA    | ATTGGAACATGGCCTCTGGATGGA |
| hMYL7         | ACATCATCACCCATGGAGACGAGA   | GCAACAGAGTTTATTGAGGTGCC  |
| hFOXA2        | GCATTCCAATCTTGACACGGTGA    | GCCCTTGCAGCCAGAATACACATT |
| hNEUROD       | TCCCATGTCTTCCACGTTAAGCCT   | CATCAAAGGAAGGGCTGGTGAAT  |
| hPECAM        | TTCTTGACAGTGTCTTGAGTGGGT   | TTTGGCTAGGCCTGGTTCTCATCT |
| hPDGFRB       | TGGCTAGACACGGGAGAATACTT    | AAGATGTAGAGCCGTTTCCGCTCA |
| hDDR2         | ACCAGCCATTTGTCCTGACTCTGT   | ATCACTCGTCGCCTTGTGAAGGA  |
| hTHY1         | ATACCAGCAGTTCACCCATCCAGT   | ATTTGCTGGTGAAGTTGTTTCGGG |
| hSIRPA        | ACCTGGCTCAGGCTAGTTCCAAAT   | TGTGCACACGTATGTGCTGTCTCT |
| hCD47         | AGCTCTAAACAAGTCCACTGTCCC   | TCCTGTGTGTGAGACAGCATCACT |

**Supplementary Table 3** Primer sequences used for RT qPCR analysis
